# Supplementary material for: Outer Membrane Vesicles of Avian Pathogenic Escherichia coli Mediate the Horizontal Transmission of blaCTX-M-55
Source: MDPI journal article supplement (doi:10.3390/pathogens11040481), 2022-04-18
Supplement: s1 [file s1]

Table S1 Minimal inhibitory concentrations, gene and plasmid analysis of the bacteria used in this study

| Strain       | Antibiotic (µg/mL) |      |     |     |      |      |     |      |      | Resistance Gene                                                                                                                                                                                                                                                                            | Plasmid                                            |
|--------------|--------------------|------|-----|-----|------|------|-----|------|------|--------------------------------------------------------------------------------------------------------------------------------------------------------------------------------------------------------------------------------------------------------------------------------------------|----------------------------------------------------|
|              | CAZ                | CTX  | AML | AMP | MEM  | ATM  | FOX | ENR  | FFC  |                                                                                                                                                                                                                                                                                            |                                                    |
| SCAO22       | 512                | 512  | 512 | 512 | <0.5 | 256  | 32  | 16   | 128  | <i>bla</i> <sub>CTX-M-55</sub> , <i>bla</i> <sub>TEM-1B</sub> , <i>aac</i> (3)- <i>IV</i> , <i>aph</i> (3')- <i>Ia</i> , <i>sul2</i> , <i>tet</i> (B), <i>catA1</i> , <i>floR</i> , <i>dfrA17</i> , <i>aph</i> (6)- <i>Id</i> , <i>aph</i> (6)- <i>Id</i> , <i>mph</i> (A), <i>sitABCD</i> | IncI2, Col440I, IncFIB, p0111, IncFIC, IncI, IncQ1 |
| EC600        | 1                  | <0.5 | 8   | 8   | <0.5 | <0.5 | 2   | <0.5 | <0.5 | ND                                                                                                                                                                                                                                                                                         | ND                                                 |
| OMV-EC600    | 512                | 512  | 512 | 512 | <0.5 | 256  | 32  | 8    | 64   | <i>bla</i> <sub>CTX-M-55</sub> , <i>bla</i> <sub>TEM-1B</sub> , <i>floR</i> , <i>aac</i> (3)- <i>IV</i>                                                                                                                                                                                    | IncI2, IncI, Col440I                               |
| AMLOMV-EC600 | 512                | 512  | 512 | 512 | <0.5 | 256  | 32  | 8    | 64   | <i>bla</i> <sub>CTX-M-55</sub> , <i>bla</i> <sub>TEM-1B</sub> , <i>floR</i> , <i>aac</i> (3)- <i>IV</i>                                                                                                                                                                                    | IncI2, IncI, Col440I                               |
| ENROMV-EC600 | 512                | 512  | 512 | 512 | <0.5 | 256  | 32  | 8    | 64   | <i>bla</i> <sub>CTX-M-55</sub> , <i>bla</i> <sub>TEM-1B</sub> , <i>floR</i> , <i>aac</i> (3)- <i>IV</i>                                                                                                                                                                                    | IncI2, IncI, Col440I                               |

ND: not detected; the MIC resistance breakpoints of Cefotaxime (CTX), Ceftazidime (CAZ), Amoxicillin (AML), Ampicillin (AMP), Meropenem (MEM), Aztreonam (ATM), Cefoxitin (FOX), Florfenicol (FFC) are 2 µg/mL, 4 µg/mL, 8 µg/mL, 8 µg/mL, 8 µg/mL, 4 µg/mL, 8 µg/mL, and 8 µg/mL .
