# Supplementary material for: Outer Membrane Vesicles of Avian Pathogenic Escherichia coli Mediate the Horizontal Transmission of blaCTX-M-55
Source: MDPI journal article supplement (doi:10.3390/pathogens11040481), 2022-04-18
Supplement: s1 [file s1]

Table S2 Physical characteristics of OMVs isolated from *E. coli* SCAO22

| Treatment     | Antibiotic concentration (µg/mL) | Mean size distribution <sup>a</sup> (nm) | Concentration <sup>b</sup> (Particles/mL) | Copies of <i>bla</i> <sub>CTX-M-55</sub> (copies/µL) | Transfer frequency (CFU/mL) |
|---------------|----------------------------------|------------------------------------------|-------------------------------------------|------------------------------------------------------|-----------------------------|
| No treatment  | -                                | 79.42                                    | 2.26±0.78x10 <sup>10</sup>                | 208                                                  | 4.17±2.13x10 <sup>-6</sup>  |
| AML treatment | 128                              | 60.14                                    | 8.89±0.36x10 <sup>11</sup>                | 1196                                                 | 4.26±2.47x10 <sup>-6</sup>  |
| ENR treatment | 4                                | 64.18                                    | 5.66±1.2x10 <sup>12</sup>                 | 30615                                                | 6.8±2.14x10 <sup>-5</sup>   |

a: The average of the three experiments

b: The volume of the medium used for OMV extraction was 400 mL
